# Supplementary material
Source: HighWire-hosted journal article supplement (https://diabetes.diabetesjournals.org/content/suppl/2007/11/26/db07-0092)
Supplement: db070092OnlineAppendixFigure.pdf [file db070092OnlineAppendixFigure.pdf]

# Online Only Appendix Fig. 1

IGRP  
R.E. Sites:

BamH I  
-3911

Xba I  
-1342

HinD III  
-911

Bgl II  
-508

Pst I  
-3

Kpn I  
-35

pPD1.27  
R.E. Sites:

Sph I

HinD III

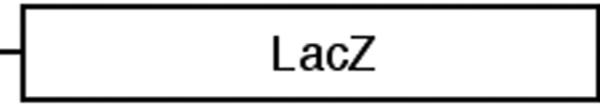

Not I
